# Supplementary material for: Strategically improving the intrinsic proton conductivity of UiO-66-NH2 by post-synthesis modification
Source: Royal Society of Chemistry journal article supplement (doi:10.1039/d1dt00400j), 2021-01-01
Supplement: d1dt00400j1.pdf [file d1dt00400j1.pdf]

## Strategically improving the intrinsic proton conductivity of UiO-66-NH<sub>2</sub> by post-synthesis modification

Lu Feng,<sup>a,b</sup> Jirong Lan,<sup>a</sup> Fangyuan Chen,<sup>a</sup> Haobo Hou<sup>a,b\*</sup> and Hong Zhou<sup>c\*</sup>

<sup>a</sup>. School of Resource and Environmental Science, Wuhan University, Wuhan 430072, Hubei, China.

Corresponding author: [hnb-bhh@163.com](mailto:hnb-bhh@163.com)

<sup>b</sup>. Wuhan Univ. (zhaoqing) GD, HK and MO Environ Technol Research INST, Zhaoqing, Guangdong, China.

<sup>c</sup>. College of Chemistry and Environmental Technology, Wuhan Institute of Technology, Wuhan 430073, Hubei, China. Corresponding author: [hzhohu@126.com](mailto:hzhohu@126.com)

## Supporting Information

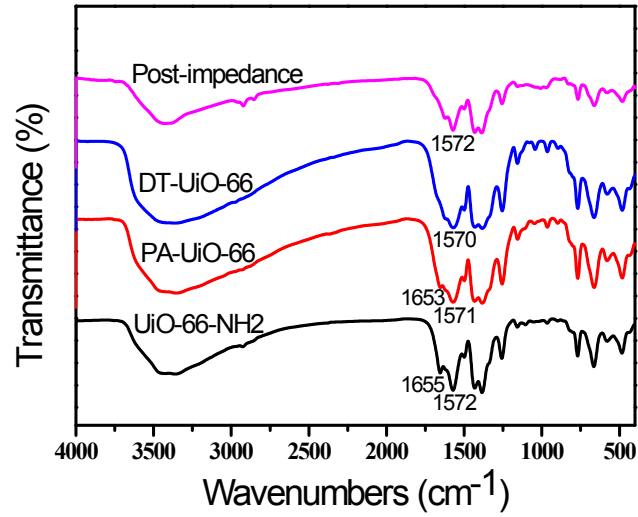

**Fig. S1** The IR spectra of UiO-66-NH<sub>2</sub>, PA-UiO-66 and DT-UiO-66 as well as the sample of DT-UiO-66 after the AC measurement.

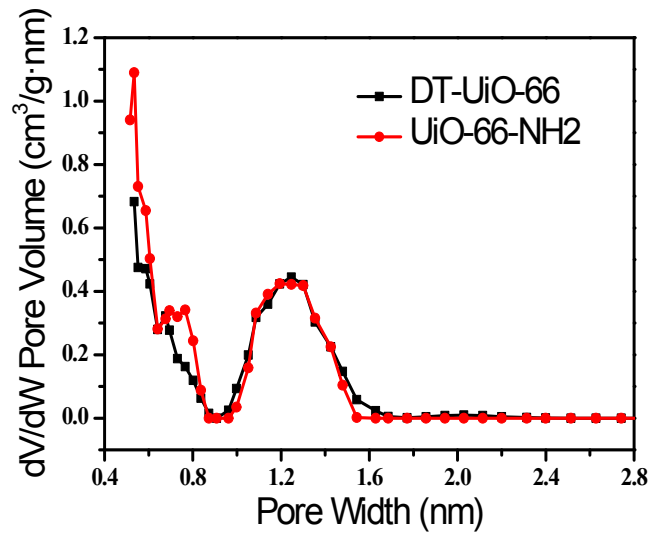

**Fig. S2** The pore size distributions of UiO-66-NH<sub>2</sub> and DT-UiO-66 obtained by NLDFT model.

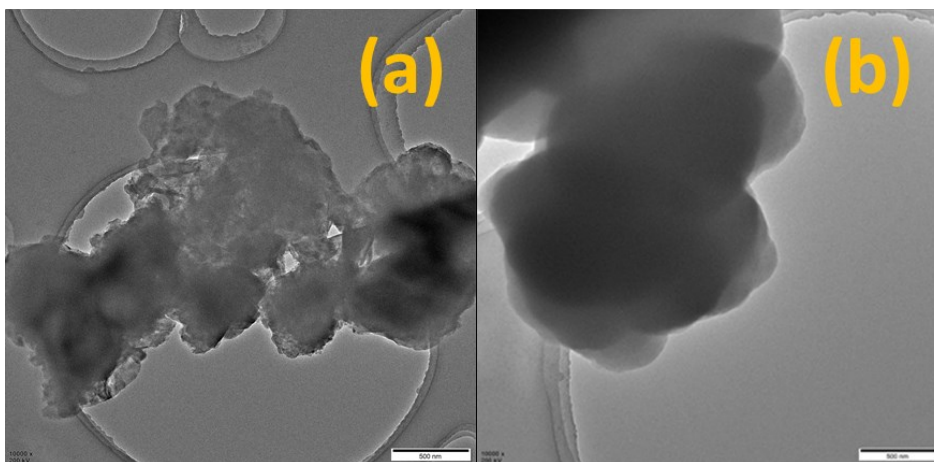

**Fig. S3** TEM images of (a) UiO-66-NH<sub>2</sub> and (b) PA-UiO-66.

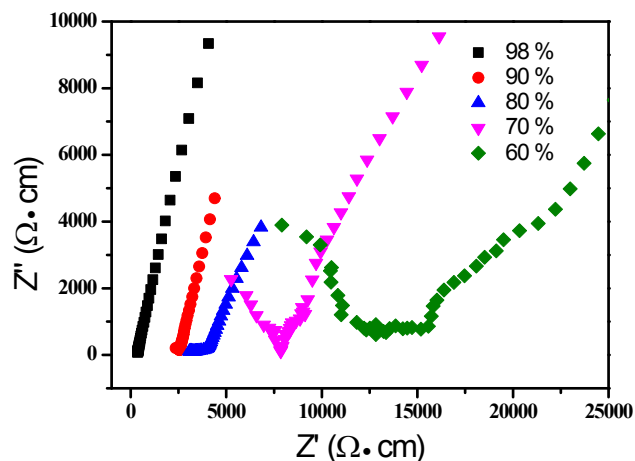

**Fig. S4** Plots of the impedance plane for DT-UiO-66 at different relative humidity and 363 K.

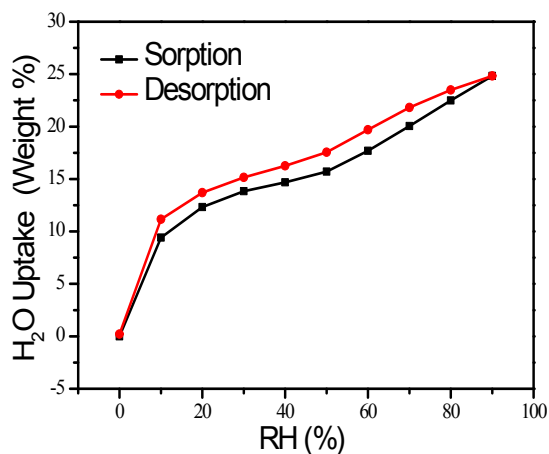

**Fig. S5** Water adsorption–desorption isotherms (298 K) for the activated sample of DT-UiO-66 in a vacuum at 80 °C for 12 h.

**Table S1** The resistance (R) and conductivity ( $\sigma$ ) of DT-UiO-66 under different temperature and 98% RH. The values of pellet dimensions including sample thickness ( $l$ ) and diameter are 500  $\mu$ m and 2 mm, respectively.

| Temperature (K) | R ( $\Omega$ ) | $\sigma$ (S/cm)       |
|-----------------|----------------|-----------------------|
| 293             | 1325.32        | $1.20 \times 10^{-3}$ |
| 303             | 1175.68        | $1.35 \times 10^{-3}$ |
| 313             | 1016.34        | $1.57 \times 10^{-3}$ |
| 323             | 828.53         | $1.92 \times 10^{-3}$ |
| 333             | 734.36         | $2.17 \times 10^{-3}$ |
| 343             | 579.42         | $2.75 \times 10^{-3}$ |
| 353             | 471.53         | $3.38 \times 10^{-3}$ |
| 363             | 367.35         | $4.33 \times 10^{-3}$ |

**Table S2** The resistance (R) and conductivity ( $\sigma$ ) of DT-UiO-66 under different relative humidity and 363 K.

| RH (%) | R ( $\Omega$ ) | $\sigma$ (S/cm)       |
|--------|----------------|-----------------------|
| 60     | 15195.83       | $1.05 \times 10^{-4}$ |
| 70     | 8231.36        | $1.93 \times 10^{-4}$ |
| 80     | 3970.42        | $4.01 \times 10^{-4}$ |
| 90     | 2529.45        | $6.30 \times 10^{-4}$ |
| 98     | 367.35         | $4.33 \times 10^{-3}$ |

**Table S3** The resistance (R) and conductivity ( $\sigma$ ) of DT-UiO-66 (373 K and 100% RH) under different time.

| Time (h) | R ( $\Omega$ ) | $\sigma$ (S/cm)       |
|----------|----------------|-----------------------|
| 0        | 356.36         | $4.47 \times 10^{-3}$ |
| 4        | 360.34         | $4.42 \times 10^{-3}$ |
| 8        | 363.60         | $4.38 \times 10^{-3}$ |
| 12       | 367.12         | $4.34 \times 10^{-3}$ |
| 16       | 366.85         | $4.34 \times 10^{-3}$ |
